# Supplementary material for: A Reversible Bis(Salamo)-Based Fluorescence Sensor for Selective Detection of Cd2+ in Water-Containing Systems and Food Samples
Source: MDPI journal article supplement (doi:10.3390/ma11040523), 2018-03-29
Supplement: s1 [file s1]

Supplementary

# A Reversible Bis(salamo)-based Fluorescence Sensor for Selective Detection of Cd<sup>2+</sup> in Water-containing Systems and Food Samples

Jing Hao, Xiao-Yan Li, Yang Zhang and Wen-Kui Dong \*

School of Chemical and Biological Engineering, Lanzhou Jiaotong University, Lanzhou 730070, China; haojingmm@126.com (J.H.); L1401569787@163.com (X.-Y.L.); zhangy8124@163.com (Y.Z.)

\* Correspondence: dongwk@mail.lzjtu.cn

Received: 27 February 2018; Accepted: 28 March 2018; Published: 28 March 2018

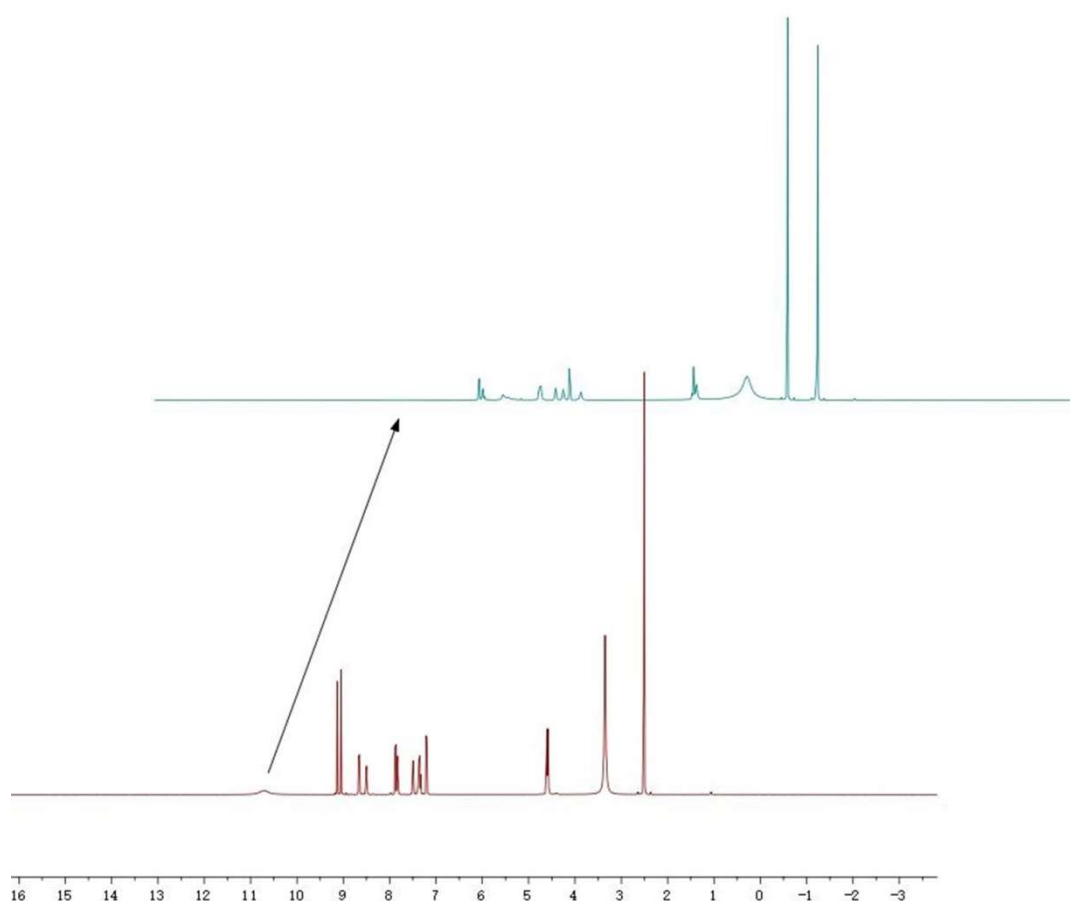

**Figure S1.** <sup>1</sup>H NMR titration in upon addition of 3.0 equiv. Cd<sup>2+</sup>.

|                                           |                                                                    |                                                                    |                                                                    |                                                                  |                                                                    |                                                                    |                                                                    |                                                                    |                                                                   |                                                                   |                                                                    |                                                                   |                                                                    |
|-------------------------------------------|--------------------------------------------------------------------|--------------------------------------------------------------------|--------------------------------------------------------------------|------------------------------------------------------------------|--------------------------------------------------------------------|--------------------------------------------------------------------|--------------------------------------------------------------------|--------------------------------------------------------------------|-------------------------------------------------------------------|-------------------------------------------------------------------|--------------------------------------------------------------------|-------------------------------------------------------------------|--------------------------------------------------------------------|
| H <sub>4</sub> L                          | H <sub>4</sub> L<br>+<br>Cu <sup>2+</sup>                          | H <sub>4</sub> L<br>+<br>Ba <sup>2+</sup>                          | H <sub>4</sub> L<br>+<br>Ca <sup>2+</sup>                          | H <sub>4</sub> L<br>+<br>K <sup>+</sup>                          | H <sub>4</sub> L<br>+<br>Cr <sup>3+</sup>                          | H <sub>4</sub> L<br>+<br>Mn <sup>2+</sup>                          | H <sub>4</sub> L<br>+<br>Sr <sup>2+</sup>                          | H <sub>4</sub> L<br>+<br>Co <sup>2+</sup>                          | H <sub>4</sub> L<br>+<br>Na <sup>+</sup>                          | H <sub>4</sub> L<br>+<br>Li <sup>+</sup>                          | H <sub>4</sub> L<br>+<br>Ni <sup>2+</sup>                          | H <sub>4</sub> L<br>+<br>Ag <sup>+</sup>                          | H <sub>4</sub> L<br>+<br>Zn <sup>2+</sup>                          |
| H <sub>4</sub> L<br>+<br>Cd <sup>2+</sup> | H <sub>4</sub> L<br>+<br>Cd <sup>2+</sup><br>+<br>Cu <sup>2+</sup> | H <sub>4</sub> L<br>+<br>Cd <sup>2+</sup><br>+<br>Ba <sup>2+</sup> | H <sub>4</sub> L<br>+<br>Cd <sup>2+</sup><br>+<br>Ca <sup>2+</sup> | H <sub>4</sub> L<br>+<br>Cd <sup>2+</sup><br>+<br>K <sup>+</sup> | H <sub>4</sub> L<br>+<br>Cd <sup>2+</sup><br>+<br>Cr <sup>3+</sup> | H <sub>4</sub> L<br>+<br>Cd <sup>2+</sup><br>+<br>Mn <sup>2+</sup> | H <sub>4</sub> L<br>+<br>Cd <sup>2+</sup><br>+<br>Sr <sup>2+</sup> | H <sub>4</sub> L<br>+<br>Cd <sup>2+</sup><br>+<br>Co <sup>2+</sup> | H <sub>4</sub> L<br>+<br>Cd <sup>2+</sup><br>+<br>Na <sup>+</sup> | H <sub>4</sub> L<br>+<br>Cd <sup>2+</sup><br>+<br>Li <sup>+</sup> | H <sub>4</sub> L<br>+<br>Cd <sup>2+</sup><br>+<br>Ni <sup>2+</sup> | H <sub>4</sub> L<br>+<br>Cd <sup>2+</sup><br>+<br>Ag <sup>+</sup> | H <sub>4</sub> L<br>+<br>Cd <sup>2+</sup><br>+<br>Zn <sup>2+</sup> |

**Figure S2.** The result of colorimetric measured photographs with sensor H<sub>4</sub>L for detecting Cd<sup>2+</sup> under irradiation at 365 nm.
